# Supplementary material for: Dark Fermentation in the Dark Biosphere: The Case of Citrobacter sp. T1.2D-12
Source: MDPI journal article supplement (doi:10.3390/fermentation9100887), 2023-09-30
Supplement: s1 [file s1]

Archive with 2 entries (2 files):
- Supplementary figures.pdf
- Supplementary Tables.xlsx
