# Supplementary material for: Dark Fermentation in the Dark Biosphere: The Case of Citrobacter sp. T1.2D-12
Source: MDPI journal article supplement (doi:10.3390/fermentation9100887), 2023-09-30
Supplement: s1 [file s1 › Supplementary Tables.xlsx]

## Sheet: Table S1
Complex/pathway	Gene	Protein	Accession number UNIPROT
FHL	hycA	Formate hydrogenlyase subunit 1	P0AEV4
	hycB	Formate hydrogenlyase subunit 2	P0AAK1
	hycC	Formate hydrogenlyase subunit 3	P16429
	hycD	Formate hydrogenlyase subunit 4	P16430
	hycE	Formate hydrogenlyase subunit 5	P16431
	hycF	Formate hydrogenlyase subunit 6	P16432
	hycG	Formate hydrogenlyase subunit 7	P16433
	hycH	Formate hydrogenlyase maturation protein HycH	P0AEV7
	hycI	Hydrogenase 3 maturation protease	P0AEV9
	fdhF	Formate dehydrogenase H	P07658
[NiFe] maturases	hypA	Hydrogenase maturation factor HypA	P0A700
	hypB	Hydrogenase maturation factor HypB	P0AAN3
	hypC	Hydrogenase maturation factor HypC	P0AAM3
	hypD	Hydrogenase maturation factor HypD	P24192
	hypE	Carbamoyl dehydratase HypE	P24193
Hyd-2	hybO	Hydrogenase-2 small chain	P69741
	hybA	Hydrogenase-2 operon protein HybA	P0AAJ8
	hybB	Probable Ni/Fe-hydrogenase 2 b-type cytochrome subunit	P37180
	hybC	Hydrogenase-2 large chain	P0ACE0
	hybD	Hydrogenase 2 maturation protease	P37182
	hybE	Hydrogenase-2 operon protein HybE	P0AAN1
	hybF	Hydrogenase maturation factor HybF	P0A703
	hybG	Hydrogenase maturation factor HybG	P0AAM7
Nitrate reductase	narG	Respiratory nitrate reductase 1 alpha chain	P09152
	narH	Respiratory nitrate reductase subunit beta	I3R9M8
	narI	Respiratory nitrate reductase 1 gamma chain	P11350
Tetrathionate reductase	ttrR	Tetrathionate response regulatory protein TtrR	Q7CQM8
	ttrS	Tetrathionate sensor histidine kinase TtrS	Q8ZPP6
	ttrB	Tetrathionate reductase subunit B	Q7CQM9
	ttrC	Tetrathionate reductase subunit C	Q9Z4S7
	ttrA	Tetrathionate reductase subunit A	Q9Z4S6
Mixed-acid fermentation	ackA	Acetate kinase	P0A6A3
	acnB	Aconitate hydratase B	P36683
	adhE	Bifunctional aldehyde-alcohol dehydrogenase AdhE	P0A9Q7
	adhP	Alcohol dehydrogenase, propanol-preferring	P39451
	eutD	Phosphate acetyltransferase EutD	P77218
	eutE	Acetaldehyde dehydrogenase (acetylating) EutE	P77445
	frdA	Fumarate reductase flavoprotein subunit	P00363
	frdB	Fumarate reductase iron-sulfur subunit	P0AC47
	frdC	Fumarate reductase subunit C	P0A8Q0
	frdD	Fumarate reductase subunit D	P0A8Q3
	fumA	Fumarate hydratase class I, aerobic	P0AC33
	fumB	Fumarate hydratase class I, anaerobic	P14407
	fumC	Fumarate hydratase class II	P05042
	fumD	Fumarase D	P0ACX5
	fumE	Fumarase E	P11663
	gltA	Citrate synthase	P0ABH7
	icd	Isocitrate dehydrogenase [NADP]	P08200
	ldhA	D-lactate dehydrogenase	P52643
	maeA	NAD-dependent malic enzyme	P26616
	mdh	Malate dehydrogenase	P61889
	pflB	Formate acetyltransferase 1	P09373
	ppc	Phosphoenolpyruvate carboxylase	P00864
	pta	Phosphate acetyltransferase	P0A9M8
	pykA	Pyruvate kinase II	P21599
	pykF	Pyruvate kinase I	P0AD61
	tdcE	PFL-like enzyme TdcE	P42632
Oxalate fermentation	frc	Formyl-CoA:oxalate CoA-transferase	P69902
Heavy metal tolerance	copA	Probable copper-importing P-type ATPase A	P32113
	cueO	Multicopper oxidase CueO	P36649
	cusA	Cation efflux system protein CusA	P38054
	cusB	Cation efflux system protein CusB	P77239
	cusC	Cation efflux system protein CusC	P77211
	cusF	Cation efflux system protein CusF	P77214
	cusR	Transcriptional regulatory protein CusR	P0ACZ8
	cusS	Sensor histidine kinase CusS	P77485
	nikA	Nickel-binding periplasmic protein	P33590
	nikB	Nickel transport system permease protein NikB	P33591
	nikC	Nickel transport system permease protein NikC	P0AFA9
	nikD	Nickel import ATP-binding protein NikD	P33593
	nikE	Nickel import ATP-binding protein NikE	P33594
	rcnA	Nickel/cobalt efflux system RcnA	P76425
	zitB	Zinc transporter ZitB	P75757
	zntA	Zinc/cadmium/lead-transporting P-type ATPase	Q3YW59
	zntR	HTH-type transcriptional regulator ZntR	P0ACS5
	znuA	High-affinity zinc uptake system protein ZnuA	P39172
	znuB	High-affinity zinc uptake system membrane protein ZnuB	P39832
	znuC	Zinc import ATP-binding protein ZnuC	P0A9X1
	zosA	Zinc-transporting ATPase	O31688
	zupT	Zinc transporter ZupT	P0A8H3
	zur	Zinc uptake regulation protein	P0AC51
Glycerol fermentation	dhaB	Glycerol dehydratase large subunit	P45514
	dhaK	PEP-dependent dihydroxyacetone kinase, dihydroxyacetone-binding subunit DhaK	P76015
	dhaT	1,3-propanediol dehydrogenase	P45513
	fucO	Lactaldehyde reductase	P0A9S1
	gldA	Glycerol dehydrogenase	P0A9S5
	mgsA	Methylglyoxal synthase	P0A731
	yqhD	Alcohol dehydrogenase YqhD	Q46856
Fumarate reductase	frdA	Fumarate reductase flavoprotein subunit	P00363
	frdB	Fumarate reductase iron-sulfur subunit	P0AC47
	frdC	Fumarate reductase subunit C	P0A8Q0
	frdD	Fumarate reductase subunit D	P0A8Q3
Carbon fixation	rnfC	Na(+)-translocating ferredoxin:NAD(+) oxidoreductase complex subunit C	H6LC32

## Sheet: Table S2
	Cepas	ANI (%)	AAI (%)	dDDH (%)
	Citrobacter telavivensis NZ CP045205	99.92	95.0	99.8
	Citrobacter amalonaticus Y19 NZ CP011132	94.74	95.0	60.7
	Citrobacter farmeri NZ CP022695	93.68	95.0	54.6
