# Supplementary figures and images for: Dark Fermentation in the Dark Biosphere: The Case of Citrobacter sp. T1.2D-12
Source: MDPI journal article supplement (doi:10.3390/fermentation9100887), 2023-09-30

Figure S1

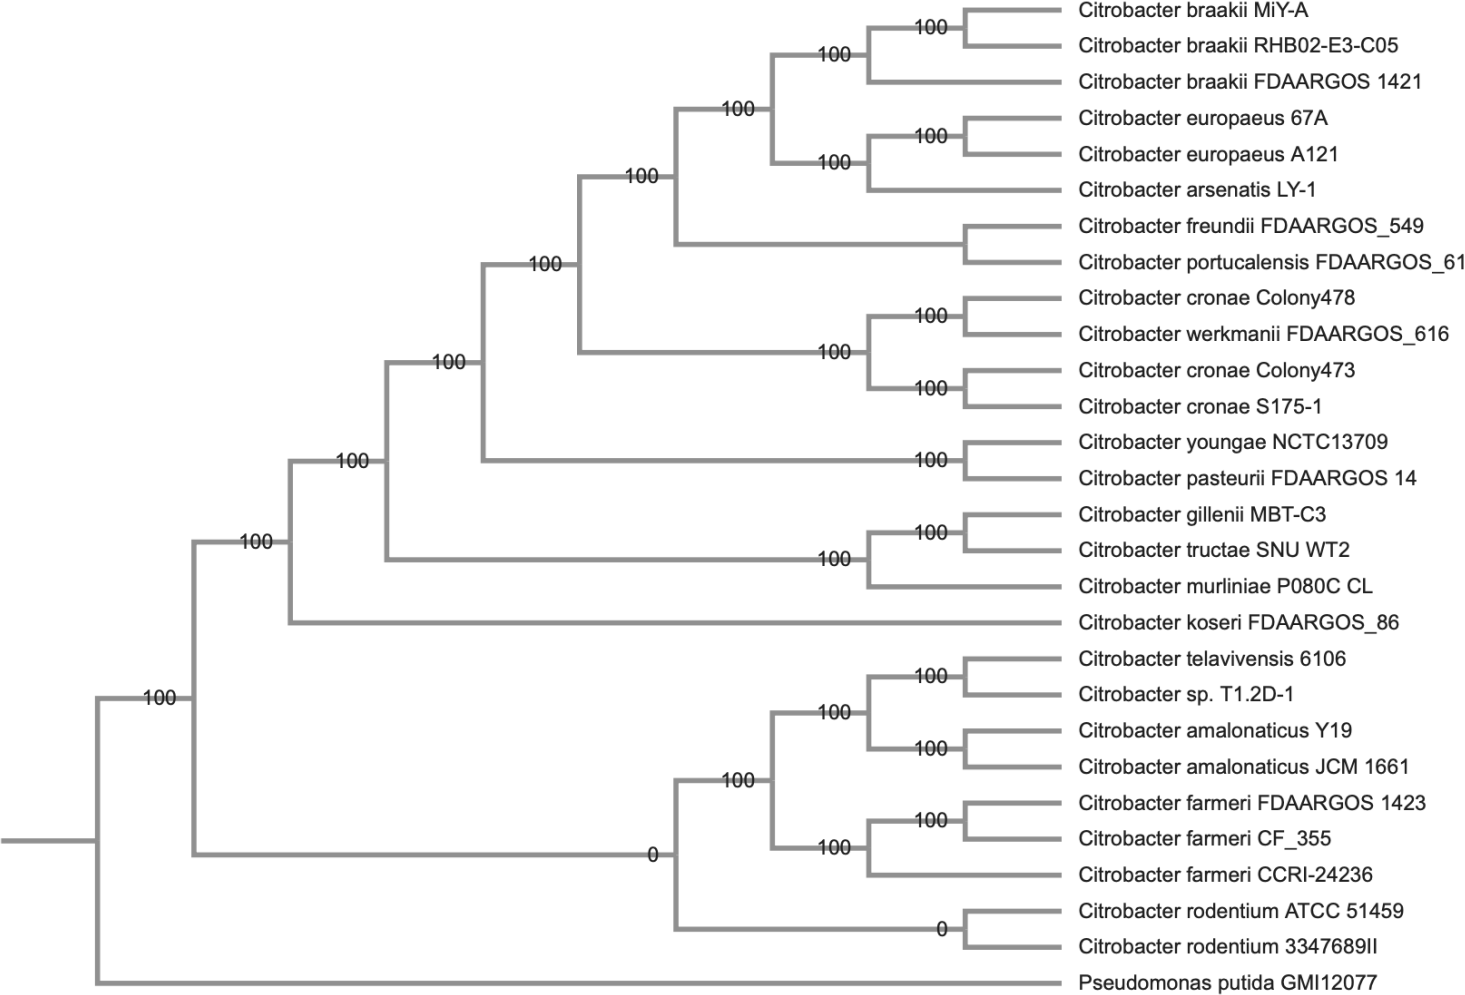

Figure S2

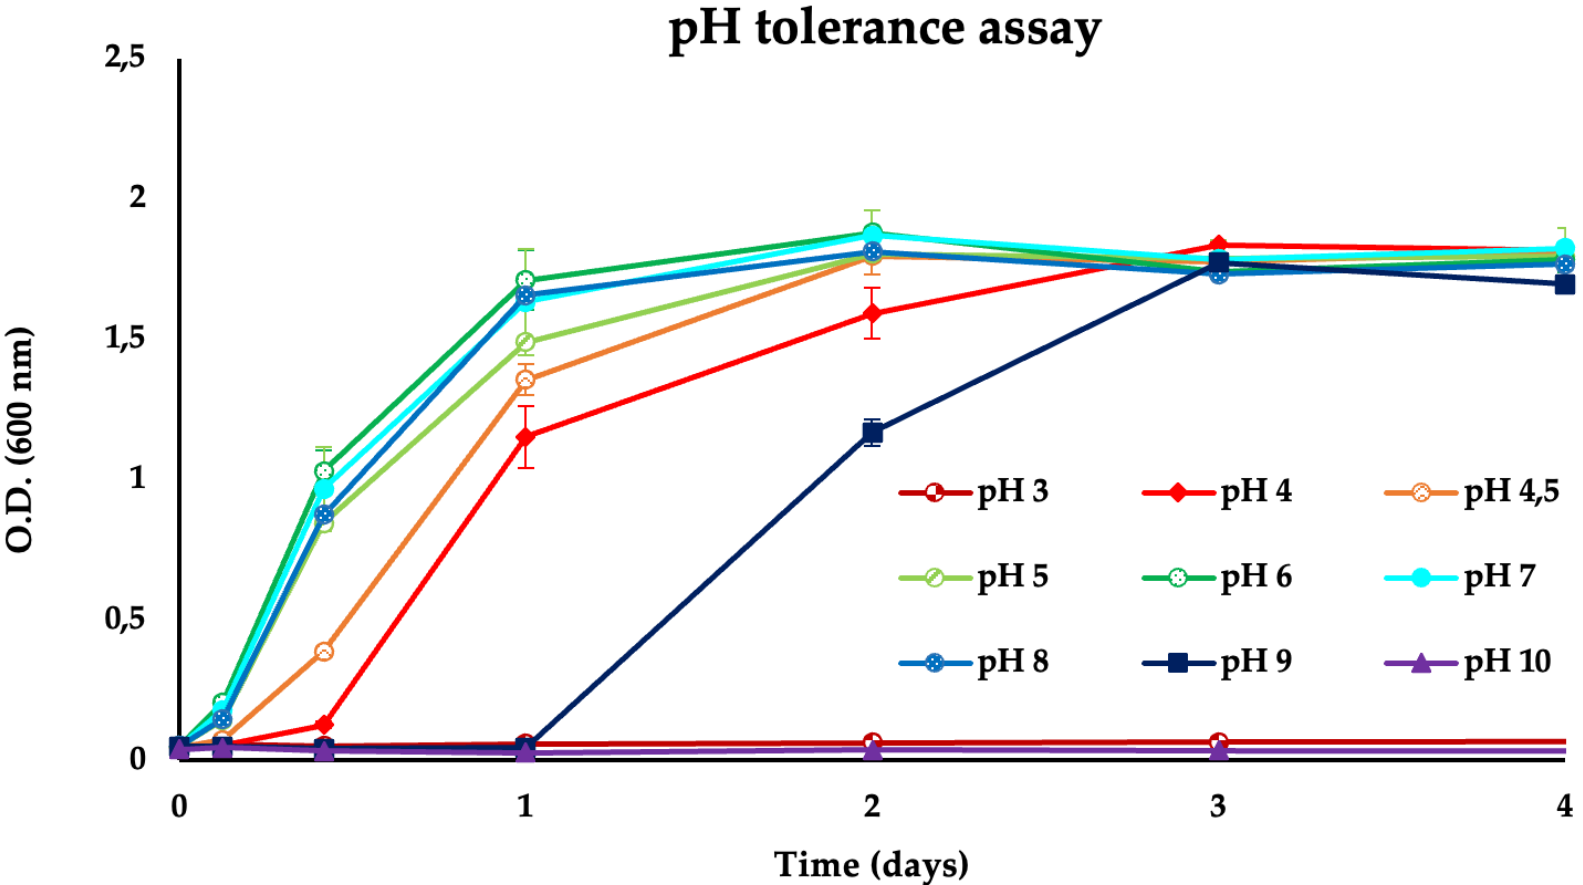

Figure S3

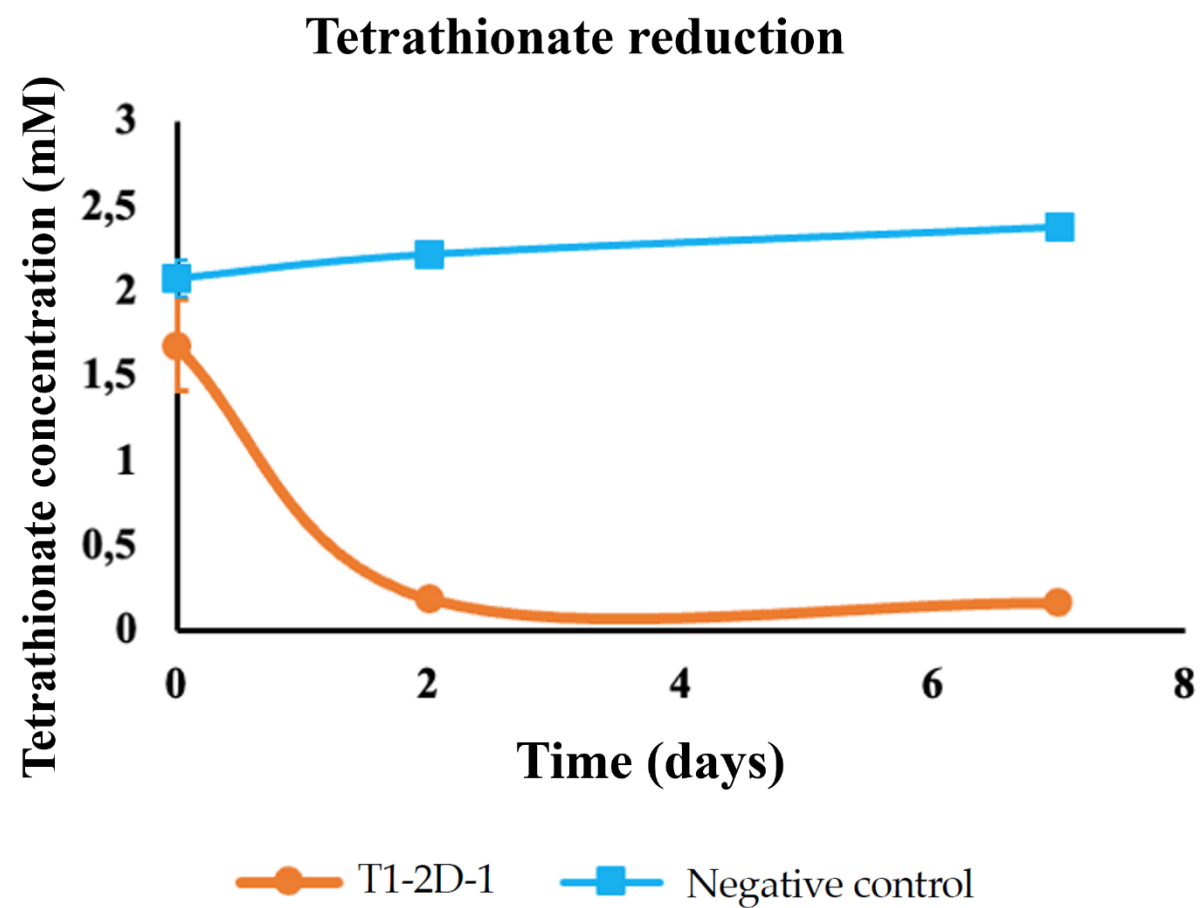

Supplement: s1 [file s1]
